# Supplementary material
Source: PubMed Central journal article supplement (PMC1403818)
Supplement: NIHMS5265-supplement-Appendix.pdf [file NIHMS5265-supplement-Appendix.pdf]

Appendix: Stimuli used in the two versions of the main experiment.

Version A

| Homophones      |                     | Synonyms           |                     | Visually matched |              |
|-----------------|---------------------|--------------------|---------------------|------------------|--------------|
| Yes             | No                  | Yes                | No                  | Yes              | No           |
| ate-eight       | blood-blush         | *certain-sure      | *comb-razor         | brwhc-brwhc      | *mxphr-mwsyr |
| baize-bays      | boil-bowl           | baby-infant        | *punishment-penalty | cmxdy-cmxdy      | bxgwf-bnwvf  |
| berry-bury      | console-council     | biscuit-cookie     | bank-money          | cpyxk-cpyxk      | dgbps-dzchp  |
| brake-break     | court-corpse        | bucket-pail        | beef-pork           | dsfwq-dsfwq      | dsvcz-dhplz  |
| ceiling-sealing | fall-fault          | car-automobile     | bone-joint          | dwgly-dwgly      | fdnsc-fmrlc  |
| cereal-serial   | friend-french       | champion-hero      | cigar-pipe          | fglqn-fglqn      | fljyt-fwrpt  |
| ewe-you         | garden-guarded      | child-kid          | cloud-sky           | fwtsf-fwtsf      | fmvrt-fhgjt  |
| fair-fare       | goddess-goodness    | couch-sofa         | coffin-grave        | ghjkl-ghjkl      | kbylx-kmhbx  |
| four-for        | gown-gone           | country-nation     | cup-plate           | jlxd-jlxd        | lkgmn-lrqvn  |
| guise-guys      | jury-duty           | dwelling-abode     | emerald-diamond     | jpmzf-jpmzf      | lmqwn-lbxpn  |
| hear-here       | lather-leather      | gift-present       | envelope-letter     | jqzfc-jqzfc      | lrpgy-lcbfy  |
| him-hymn        | mall-mole           | hearth-fireplace   | fence-gate          | khgjp-khgjp      | mzscv-mxwvp  |
| hour-our        | map-mop             | king-monarch       | garlic-sage         | lbmkp-lbmkp      | nmbsh-nbylh  |
| key-quay        | mother-mutter       | lawyer-attorney    | gravel-sand         | msxqr-msxqr      | qxlmj-qdgbj  |
| knows-nose      | navel-novel         | menace-threat      | guitar-violin       | nctbv-nctbv      | rqvfw-rjxmw  |
| links-lynx      | owl-old             | physician-doctor   | jug-bottle          | nlhjd-nlhjd      | scjyw-shlqw  |
| mode-mowed      | petal-pebble        | prison-jail        | sheep-wool          | nzbgl-nzbgl      | sdyxk-snmqk  |
| nay-neigh       | pillow-plough       | reply-answer       | soap-cream          | rszdw-rszdw      | tcgpk-thplk  |
| pray-prey       | please-pliers       | snake-serpent      | spade-rake          | sjwzb-sjwzb      | tdfhv-tjrqv  |
| road-rode       | poster-plaster      | staff-personnel    | stem-leaf           | svwrb-svwrb      | vkpcb-vwtsb  |
| rote-wrote      | pound-pounce        | teacher-instructor | stove-kettle        | vfzpl-vfzpl      | vsknc-vjdlc  |
| throne-thrown   | sausage-sauces      | toilet-lavatory    | sword-armour        | vgbgx-vgbgx      | xwpdv-xlkgv  |
| ware-wear       | sentiment-sensitive | trip-journey       | tree-bush           | xzymd-xzymd      | ytcsd-yspmd  |
| way-weigh       | shot-shop           | wrath-anger        | wall-brick          | ywqzv-ywqzv      | zqlpm-zvswm  |
| won-one         | weed-weir           | writer-author      | wax-candle          | zkjdf-zkjdf      | zxhqt-zsdyt  |

\*Indicates a trial which was excluded because of chance performance.

## Version B

| Homophones    |                      | Synonyms             |              | Visually matched |             |
|---------------|----------------------|----------------------|--------------|------------------|-------------|
| Yes           | No                   | Yes                  | No           | Yes              | No          |
| ail-ale       | accordion-accordance | **college-university | *file-nail   | ajklp-ajklp      | bnqft-bxhjt |
| allowed-aloud | ask-axe              | absent-missing       | book-paper   | brdqf-brdqf      | brzcw-bdfhw |
| beach-beech   | border-bother        | bomb-explosive       | boxes-jars   | dvpxy-dvpxy      | bztgj-bwrcj |
| bear-bare     | bottle-battle        | brawl-quarrel        | cake-pie     | dxstw-dxstw      | chrzd-cnldq |
| beet-beat     | building-bullring    | cargo-freight        | cliff-cave   | fxdvc-fxdvc      | cplhj-cyxkj |
| bite-byte     | chant-chart          | cellar-basement      | coin-gold    | hrysb-hrysb      | dngr-dzqlr  |
| board-bored   | circle-circus        | criminal-felon       | copper-lead  | jbnhc-jbnhc      | ednhj-evpxj |
| cue-queue     | diary-dairy          | cry-weep             | fairy-ghost  | jxmrg-jxmrg      | gvncl-grwhl |
| doe-dough     | egg-edge             | dress-frock          | ice-drink    | kjzhf-kjzhf      | gzchn-gxdvn |
| draft-draught | filter-fillet        | enemy-foe            | key-door     | mxjyt-mxjyt      | jydm-bjbrwb |
| foul-fowl     | foil-fail            | enigma-mystery       | leg-foot     | pdzct-pdzct      | kxtmq-kfwtq |
| great-grate   | forest-frost         | fabric-cloth         | meadow-hay   | pgvcz-pgvcz      | lvkpi-lznyj |
| jeans-genes   | grass-grace          | films-movies         | moth-fly     | plfsk-plfsk      | ncsjx-npkhx |
| muscle-mussel | honey-hunter         | hint-clue            | mug-saucer   | qlgpk-qlgpk      | nswpm-nbmkm |
| ode-owed      | lad-lid              | holiday-vacation     | orange-apple | ryqxp-ryqxp      | pjrqq-pszcg |
| pain-pane     | mist-moist           | imitate-copy         | otter-seal   | shqwy-shqwy      | rctgp-rhqkp |
| rain-reign    | pint-pine            | lift-elevator        | pen-ink      | slmdf-slmdf      | splqn-scgpn |
| raise-rays    | pole-polo            | lobby-foyer          | river-bridge | spnkl-spnkl      | vswkb-vdngb |
| sail-sale     | prince-print         | operation-surgery    | satin-silk   | tcbfr-tcbfr      | wrpk-wxtvs  |
| sew-sow       | seed-soot            | outcome-effect       | spoon-fork   | tdkyt-tdkyt      | wyznq-wrysq |
| sight-cite    | shake-shock          | poison-venom         | stove-kettle | vnbgh-vnbgh      | xhjyh-xfsh  |
| sweet-suite   | soar-source          | rehearsal-practice   | sugar-salt   | wrdmb-wrdmb      | ydqvt-ycsjt |
| threw-through | soup-supper          | satchel-bag          | tadpole-newt | wrgxp-wrgxp      | zbxpm-zmqwm |
| tyre-tire     | vision-villain       | stairs-steps         | wine-grape   | xtvkn-xtvkn      | zdwqb-zvknb |
| would-wood    | void-volt            | student-pupil        |              | zqpty-zqpty      | zhldq-zcjd  |
|               |                      | visitor-guest        |              |                  |             |

\*\*In British English, “college” typically refers to the final two years before university. In this experiment, however, 80% of the participants rated the pair as synonyms so it was re-classified as a “yes” trial.
